# Supplementary material for: Identification of key genes and pathways in the hPSC-derived lungs infected by the SARS-CoV-2
Source: Research Square preprint supplement (doi:10.21203/rs.3.rs-114578/v1), 2020-11-25
Supplement: Supplementary file 1 [file 6245f3096307cf667dabcf6f.xlsx]

## Sheet: cluster 1 enrichment.RCTM
#term ID	term description	observed gene count	background gene count	strength	false discovery rate	matching proteins in your network (IDs)	matching proteins in your network (labels)
HSA-983168	Antigen processing: Ubiquitination & Proteasome degradation	23	303	1.81	5.21e-40	9606.ENSP00000258200,9606.ENSP00000259939,9606.ENSP00000273480,9606.ENSP00000287156,9606.ENSP00000290650,9606.ENSP00000292363,9606.ENSP00000312397,9606.ENSP00000313034,9606.ENSP00000322937,9606.ENSP00000328187,9606.ENSP00000348632,9606.ENSP00000348838,9606.ENSP00000361540,9606.ENSP00000365944,9606.ENSP00000365961,9606.ENSP00000376945,9606.ENSP00000380746,9606.ENSP00000381298,9606.ENSP00000421842,…	FBXL8,RNF144B,RNF7,UBE2L6,UBR1,RNF126,KLHL3,FBXW5,LRSAM1,FBXO21,RBCK1,UBE2C,CDC20,FBXO6,FBXO44,FBXW9,FBXL16,LONRF1,ANAPC13,KLHL5,MIB2,RNF4,LRRC41
HSA-8951664	Neddylation	11	227	1.62	1.49e-14	9606.ENSP00000258200,9606.ENSP00000273480,9606.ENSP00000312397,9606.ENSP00000313034,9606.ENSP00000328187,9606.ENSP00000365944,9606.ENSP00000365961,9606.ENSP00000376945,9606.ENSP00000380746,9606.ENSP00000423897,9606.ENSP00000477792	FBXL8,RNF7,KLHL3,FBXW5,FBXO21,FBXO6,FBXO44,FBXW9,FBXL16,KLHL5,LRRC41
HSA-597592	Post-translational protein modification	13	1366	0.91	8.99e-09	9606.ENSP00000258200,9606.ENSP00000273480,9606.ENSP00000312397,9606.ENSP00000313034,9606.ENSP00000328187,9606.ENSP00000348838,9606.ENSP00000361540,9606.ENSP00000365944,9606.ENSP00000365961,9606.ENSP00000376945,9606.ENSP00000380746,9606.ENSP00000423897,9606.ENSP00000477792	FBXL8,RNF7,KLHL3,FBXW5,FBXO21,UBE2C,CDC20,FBXO6,FBXO44,FBXW9,FBXL16,KLHL5,LRRC41
HSA-392499	Metabolism of proteins	14	1948	0.79	4.43e-08	9606.ENSP00000258200,9606.ENSP00000273480,9606.ENSP00000287156,9606.ENSP00000312397,9606.ENSP00000313034,9606.ENSP00000328187,9606.ENSP00000348838,9606.ENSP00000361540,9606.ENSP00000365944,9606.ENSP00000365961,9606.ENSP00000376945,9606.ENSP00000380746,9606.ENSP00000423897,9606.ENSP00000477792	FBXL8,RNF7,UBE2L6,KLHL3,FBXW5,FBXO21,UBE2C,CDC20,FBXO6,FBXO44,FBXW9,FBXL16,KLHL5,LRRC41
HSA-390471	Association of TriC/CCT with target proteins during biosynthesis	3	38	1.83	0.00017	9606.ENSP00000313034,9606.ENSP00000365944,9606.ENSP00000376945	FBXW5,FBXO6,FBXW9
HSA-141430	Inactivation of APC/C via direct inhibition of the APC/C complex	2	19	1.95	0.0021	9606.ENSP00000348838,9606.ENSP00000361540	UBE2C,CDC20
HSA-176407	Conversion from APC/C:Cdc20 to APC/C:Cdh1 in late anaphase	2	18	1.98	0.0021	9606.ENSP00000348838,9606.ENSP00000361540	UBE2C,CDC20
HSA-174048	APC/C:Cdc20 mediated degradation of Cyclin B	2	22	1.89	0.0024	9606.ENSP00000348838,9606.ENSP00000361540	UBE2C,CDC20
HSA-179409	APC-Cdc20 mediated degradation of Nek2A	2	24	1.85	0.0026	9606.ENSP00000348838,9606.ENSP00000361540	UBE2C,CDC20
HSA-174154	APC/C:Cdc20 mediated degradation of Securin	2	63	1.43	0.0152	9606.ENSP00000348838,9606.ENSP00000361540	UBE2C,CDC20
